# Supplementary figures and images for: Taxonomic information exchange and copyright: the Plazi approach
Source: Springer Nature journal article supplement (doi:10.1186/1756-0500-2-53), 2009-01-01

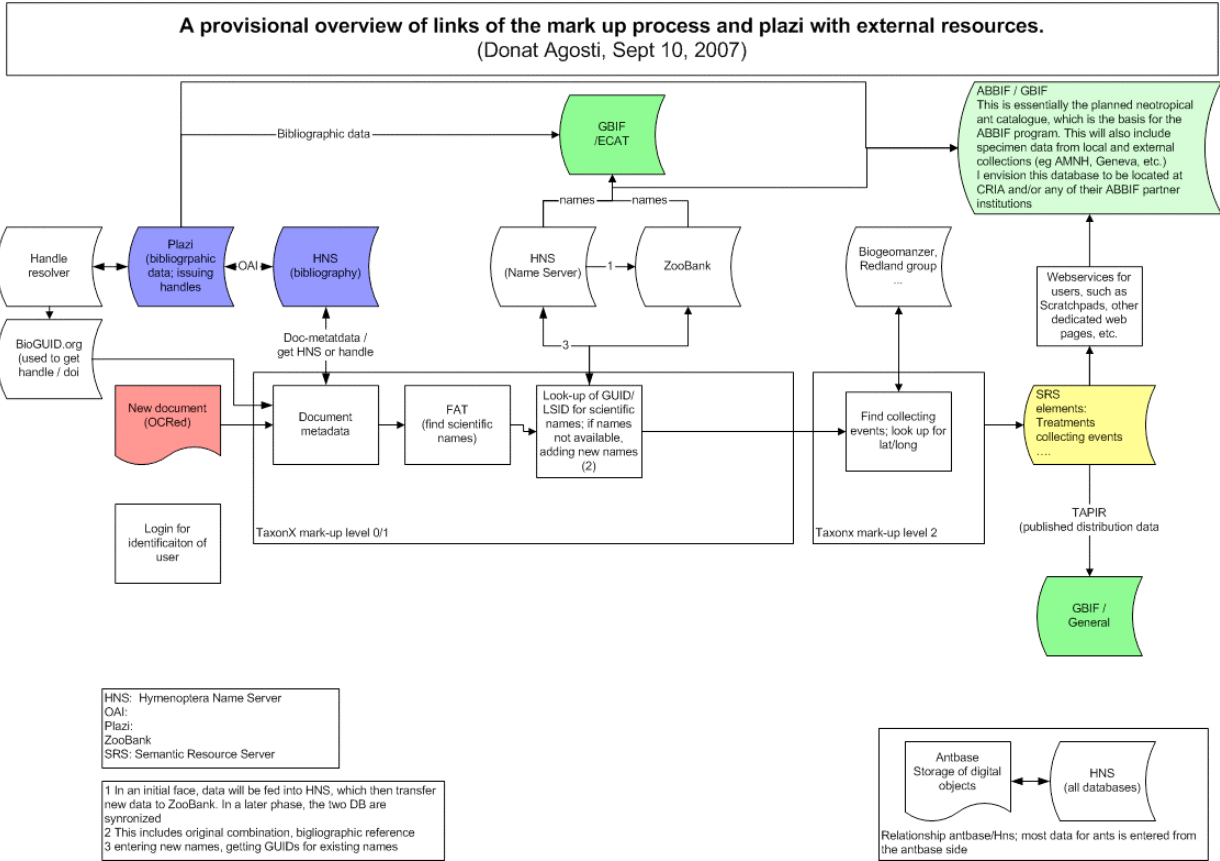

Fig. 4. Plazi links to external resources (green).

Supplement: 13104_2009_191_MOESM4_ESM.pdf [file 13104_2009_191_MOESM4_ESM.pdf]
